# Supplementary material for: Thermal acclimation of photosynthetic activity and RuBisCO content in two hybrid poplar clones
Source: PubMed Central journal article supplement (PMC6370183; doi:10.1371/journal.pone.0206021), 2019-02-11
Supplement: pone.0206021.s003.pdf [file pone.0206021.s003.pdf]

**S1 Table. Analysis of variance, *F* and *P* values for thermal acclimation-related traits.**

| Source    | DF | $A_{n\_opt}$ |                | $T_{opt}$ |                | $A_{n\_growth}$ |                | $g_{s\_growth}$ |                | $J_{max}^{25} : V_{cmax}^{25}$ |                | $N_{area}$ |                |
|-----------|----|--------------|----------------|-----------|----------------|-----------------|----------------|-----------------|----------------|--------------------------------|----------------|------------|----------------|
|           |    | <i>F</i>     | <i>P Value</i> | <i>F</i>  | <i>P Value</i> | <i>F</i>        | <i>P Value</i> | <i>F</i>        | <i>P Value</i> | <i>F</i>                       | <i>P Value</i> | <i>F</i>   | <i>P Value</i> |
| T         | 1  | 8.2          | 0.016          | 44.31     | <.001          | 2.27            | 0.162          | 1.15            | 0.285          | 4.63                           | 0.063          | 2.38       | 0.146          |
| N         | 1  | 31.77        | <b>0.011</b>   | 1.28      | 0.340          | 18.17           | 0.023          | 0.67            | 0.474          | 7.21                           | 0.074          | 49.29      | 0.005          |
| T*N       | 1  | 0.16         | 0.697          | 4.53      | 0.059          | 0               | 0.997          | 0.66            | 0.417          | 4.39                           | 0.069          | 2.35       | 0.149          |
| Clone     | 1  | 14.21        | 0.003          | 5.41      | 0.042          | 8.47            | 0.015          | 23.12           | <.001          | 11.51                          | 0.009          | 17.73      | 0.001          |
| Clone*T   | 1  | 8.46         | 0.015          | 0.32      | 0.582          | 9.63            | 0.011          | 27.56           | <.001          | 0.8                            | 0.398          | 3.67       | 0.077          |
| Clone*N   | 1  | 0.01         | 0.932          | 0.68      | 0.427          | 0.05            | 0.821          | 1.92            | 0.168          | 3.96                           | 0.081          | 0          | 0.991          |
| Clone*T*N | 1  | 4.03         | 0.072          | 0.24      | 0.632          | 1.83            | 0.205          | 10.11           | 0.001          | 0.13                           | 0.727          | 2.34       | 0.150          |

T, growth temperature; N, soil N. For abbreviation, see table 1.
