# Supplementary material for: Thermal acclimation of photosynthetic activity and RuBisCO content in two hybrid poplar clones
Source: PubMed Central journal article supplement (PMC6370183; doi:10.1371/journal.pone.0206021), 2019-02-11
Supplement: pone.0206021.s004.pdf [file pone.0206021.s004.pdf]

**S2 Table.  $P$  value and  $R^2$  of curves in figures 1, 2 and 3.**

| Clone | Treatment | $A_n$     |       | $R_d$     |       | $g_s$     |       | $V_{cmax}$ |       | $J$       |       |
|-------|-----------|-----------|-------|-----------|-------|-----------|-------|------------|-------|-----------|-------|
|       |           | $P$ value | $R^2$ | $P$ value | $R^2$ | $P$ value | $R^2$ | $P$ value  | $R^2$ | $P$ value | $R^2$ |
| M×B   | H23       | 0.011     | 0.84  | 0.001     | 0.96  | 0.001     | 0.89  | 0.039      | 0.88  | 0.035     | 0.94  |
|       | L23       | 0.010     | 0.95  | 0.001     | 0.95  | 0.003     | 0.87  |            |       |           |       |
|       | H33       | 0.010     | 0.88  | 0.001     | 0.96  | 0.01      | 0.85  | 0.001      | 0.98  | 0.001     | 0.98  |
|       | L33       | 0.084     | 0.81  | 0.001     | 0.97  | 0.07      | 0.95  | 0.001      | 0.98  | 0.001     | 0.95  |
| M×N   | H23       | 0.001     | 0.96  | 0.001     | 0.98  | 0.02      | 0.95  | 0.015      | 0.95  | 0.001     | 0.98  |
|       | L23       | 0.021     | 0.89  | 0.001     | 0.98  | 0.01      | 0.91  |            |       |           |       |
|       | H33       | 0.015     | 0.92  | 0.001     | 0.98  | 0.02      | 0.91  | 0.001      | 0.98  | 0.001     | 0.97  |
|       | L33       | 0.004     | 0.92  | 0.001     | 0.98  | 0.007     | 0.93  | 0.001      | 0.95  | 0.001     | 0.96  |

$A_n$ ,  $R_d$  and  $g_s$  response to leaf temperature were fitted using a polynomial equation of order 2 (quadratic) while  $V_{cmax}$  and  $J$  were fitted using the Arrhenius formula, following equations 7 or 8 depending on the presence or not of deactivation at high temperatures.
